# Supplementary material for: Enhanced photocatalytic activity of CdWO4/BaTiO3 heterostructure for dye degradation
Source: Royal Society of Chemistry journal article supplement (doi:10.1039/d1nj01556g), 2021-01-01
Supplement: d1nj01556g1.pdf [file d1nj01556g1.pdf]

## Electronic Supplementary Information

### Enhanced photocatalytic activity of CdWO<sub>4</sub>/BaTiO<sub>3</sub> heterostructure for dye degradation

S.P. Sai Sushma,<sup>a</sup> G. Swarupa,<sup>b</sup> T. Nagesh,<sup>a</sup> P. Someshwar,<sup>c</sup> P. Rajitha,<sup>d</sup> B. Vijaya Kumar,<sup>†\*</sup> G. Upender,<sup>†\*</sup>

<sup>a</sup>Department of Physics, Nizam College, Osmania University, Hyderabad-01, Telangana, India.

<sup>b</sup>Department of Chemistry, Nizam College, Osmania University, Hyderabad-01, Telangana, India.

<sup>c</sup>Department of Chemistry, Osmania University, Hyderabad-07, Telangana, India.

<sup>d</sup>Department of Catalysis and Fine Chemicals, CSIR-IICT, Hyderabad-07, Telangana, India.

†These authors are equally contributed to this work: upenderg@osmania.ac.in (Dr. G. Upender); vijaychemou@osmania.ac.in (Dr. B. Vijaya Kumar)

Fig. S1 shows the Raman spectrum of BaTiO<sub>3</sub> was recorded with 514.5 nm excitation source wavelength (Ar<sup>+</sup> laser source) in the wavenumber 100-1000 cm<sup>-1</sup>. This measurement was recorded in a backscattering mode using a 20× microscope objective lens. Typical laser power at the sample surface was 2.5 mW with a spot size of 2 μm diameter. The Raman peak positions appeared at 263, 305, 515 and 718 cm<sup>-1</sup>. These are Raman active lattice vibration modes, especially 305 cm<sup>-1</sup> and 718 cm<sup>-1</sup>, that exhibit the characteristic features of BaTiO<sub>3</sub> tetragonal phase. Therefore, Raman spectrum of BaTiO<sub>3</sub> confirmed the tetragonal structure. Moreover, this tetragonal crystal structure exhibits ferroelectric property.

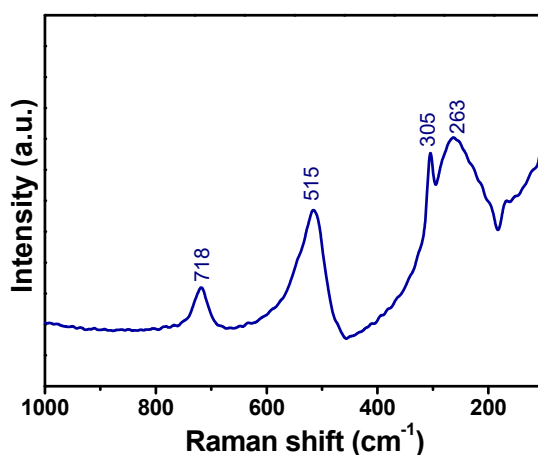

Fig. S1

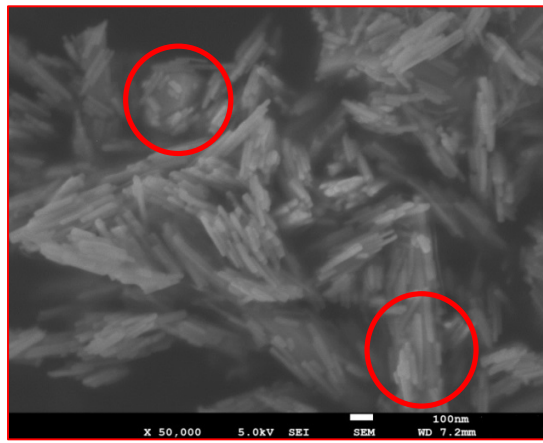

Fig. S2. FESEM image of CdWO<sub>4</sub>/BaTiO<sub>3</sub> (70:30) heterostructure.

The obtained FESEM images (Fig. S2 and Fig. S3) along with colour mapping images clearly show the homogeneous distribution of both CdWO<sub>4</sub> and BaTiO<sub>3</sub> crystals in the heterostructure.

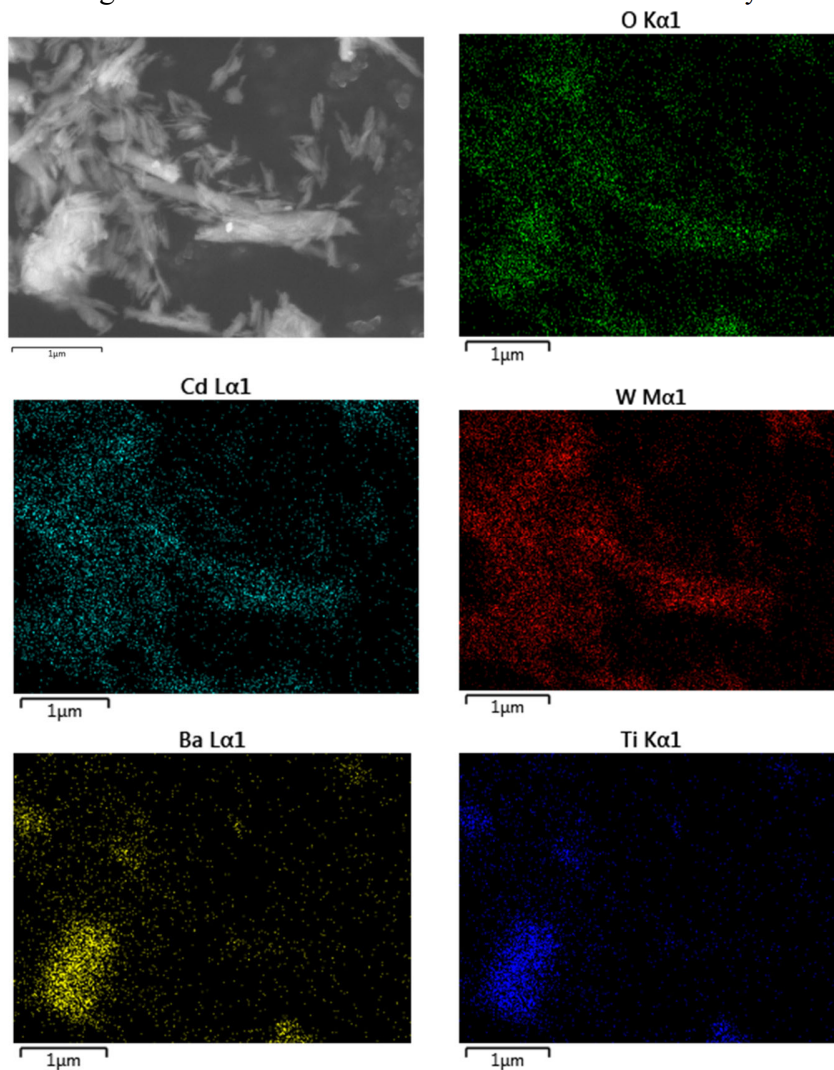

Fig. S3. FESEM image of CdWO<sub>4</sub>/BaTiO<sub>3</sub> (70:30) heterostructure and color map images of O, Cd, W, Ba and Ti.

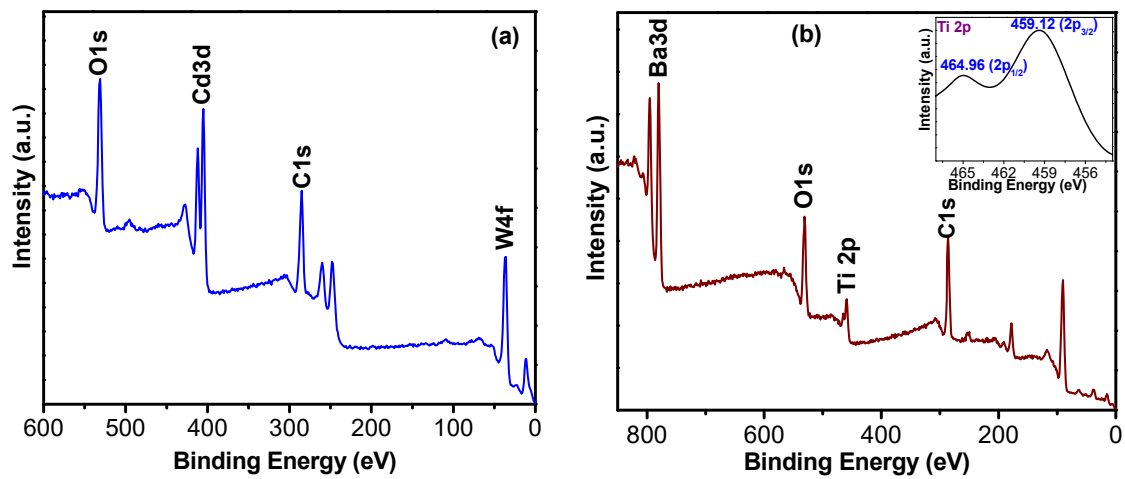

Fig. S4. The XPS survey spectrum of CdWO<sub>4</sub> (a) and BaTiO<sub>3</sub> (b). The inset of Fig. S4(b) shows the high resolution XPS spectra of Ti2p.
